# Supplementary material for: The diagnostic value of contrast-enhanced ultrasound combined with clinicopathological features in microinvasive ductal carcinoma in situ
Source: PubMed Central journal article supplement — Gland Surg. 2024 Nov 26;13(11):1894–906. doi: 10.21037/gs-24-211 (PMC11635583; doi:10.21037/gs-24-211), 2024-11-26
Supplement: gs-13-11-1894-dss.pdf [file gs-13-11-1894-dss.pdf]

## Data Sharing Statement

|                     |                                                                                                                                                     |                                                                                                                                                                                                                                                                                                         |
|---------------------|-----------------------------------------------------------------------------------------------------------------------------------------------------|---------------------------------------------------------------------------------------------------------------------------------------------------------------------------------------------------------------------------------------------------------------------------------------------------------|
| <b>Article Info</b> | <a href="https://dx.doi.org/10.21037/gc-24-211">https://dx.doi.org/10.21037/gc-24-211</a>                                                           |                                                                                                                                                                                                                                                                                                         |
| <b>Item</b>         | <b>Question</b>                                                                                                                                     | <b>Authors' Response<br/>(place "-" if not applicable)</b>                                                                                                                                                                                                                                              |
| 1                   | Would you like to share data collected for your study to others?                                                                                    | No.                                                                                                                                                                                                                                                                                                     |
| 2                   | If not, would you like to share the reason for your decision?                                                                                       | The detailed data from the PLA General Hospital's patient database is not publicly available because it contains sensitive information. To access the data, a request for extraction must be made to the Chinese PLA General Hospital. The institution requires an ethical approval to access the data. |
| 3                   | What data in particular will be shared?                                                                                                             | -                                                                                                                                                                                                                                                                                                       |
| 4                   | Any other documents will be shared? Such as study protocol, statistical analysis plan, informed consent form, clinical study report, analytic code. | -                                                                                                                                                                                                                                                                                                       |
| 5                   | When will data availability begin?                                                                                                                  | -                                                                                                                                                                                                                                                                                                       |
| 6                   | When will data availability end?                                                                                                                    | -                                                                                                                                                                                                                                                                                                       |
| 7                   | To whom will you share the data?                                                                                                                    | -                                                                                                                                                                                                                                                                                                       |
| 8                   | For what type of analysis or purpose?                                                                                                               | -                                                                                                                                                                                                                                                                                                       |
| 9                   | How or where can the data/documents be obtained?                                                                                                    | -                                                                                                                                                                                                                                                                                                       |
| 10                  | Any other restrictions?                                                                                                                             | -                                                                                                                                                                                                                                                                                                       |
